# Supplementary material
Source: HighWire-hosted journal article supplement (https://jnm.snmjournals.org/highwire/filestream/95133/field_highwire_adjunct_files/0/177279_Supplemental_Data.pdf)
Supplement: 177279_Supplemental_Data.pdf [file 177279_Supplemental_Data.pdf]

Supplemental Table 1: Effect of Diets on Total Plasma Cholesterol Levels and Body Weight

| Parameter                         | Diet | Paigen group | Paigen+eze group | vs. Paigen group |
|-----------------------------------|------|--------------|------------------|------------------|
| Total plasma cholesterol (mmol/L) | Pre  | 7.1±0.4      | 7.04±0.8         | -50% $P < 0.01$  |
|                                   | Post | 29.0±3.1     | 14.6±2.3**       |                  |
| Body weight (g)                   | Pre  | 19.1±0.4     | 18.9±0.9         | +14% $P < 0.001$ |
|                                   | Post | 18.4±0.5     | 21.0±0.2***      |                  |

\*\* $P < 0.01$  vs. Paigen group.

\*\*\* $P < 0.001$  vs. Paigen group.

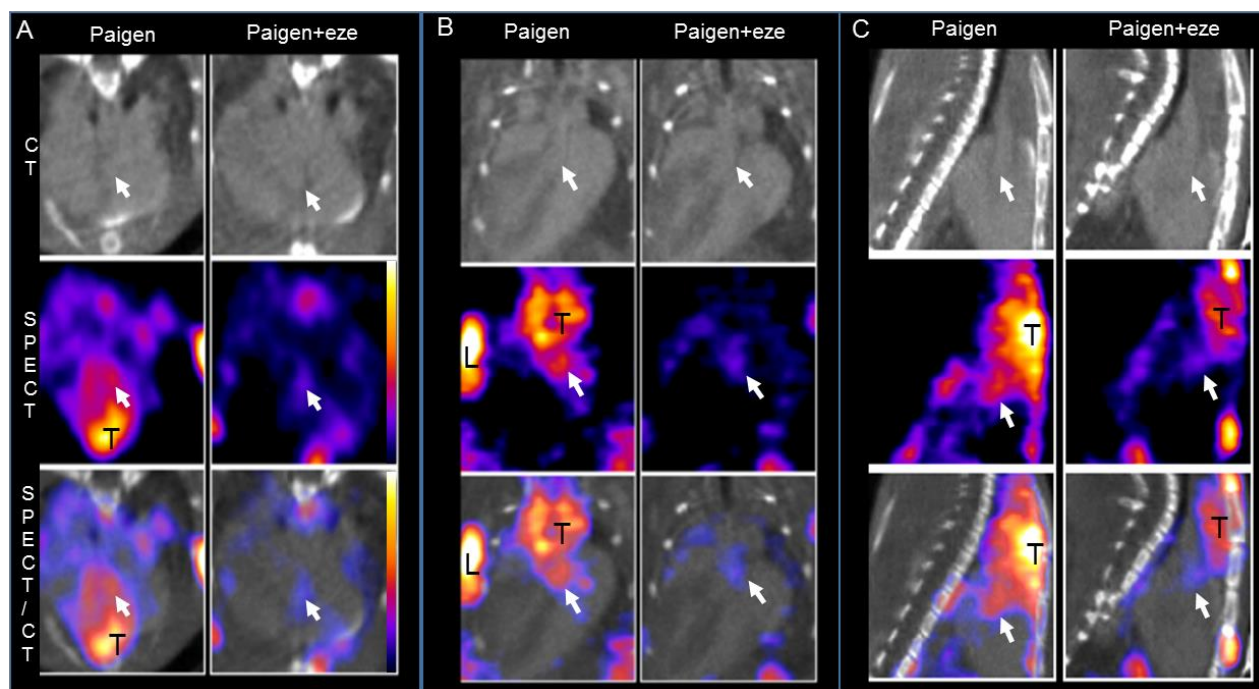

Supplemental Figure 1: In vivo SPECT/CT imaging. Transverse (A), coronal (B), and sagittal (C) views centered on ascending aorta (white arrow) of ApoE<sup>-/-</sup> mice fed a Paigen diet supplemented, or not, with ezetimibe. Retroorbital injection of Hexabrix allowed us to identify ascending aorta on CT. Scale was 0.8–2.6 %ID/g. T = thymus; L = lymph node.

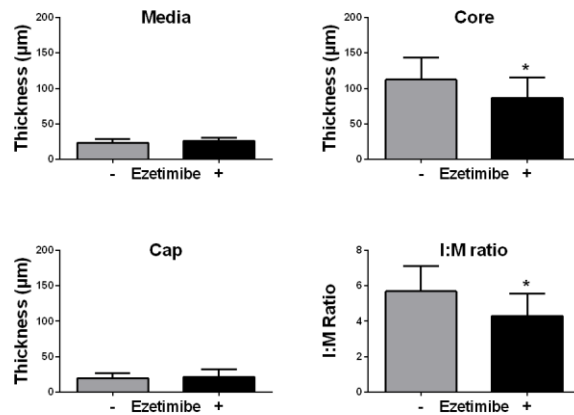

Supplemental Figure 2: Quantification of cap, media, and core thickness as well as intima-to-media (I:M) ratio in the cross-sectional area of aortic sinus of ApoE<sup>-/-</sup> mice treated, or not, with ezetimibe. \**P* < 0.05 vs. Paigen group.

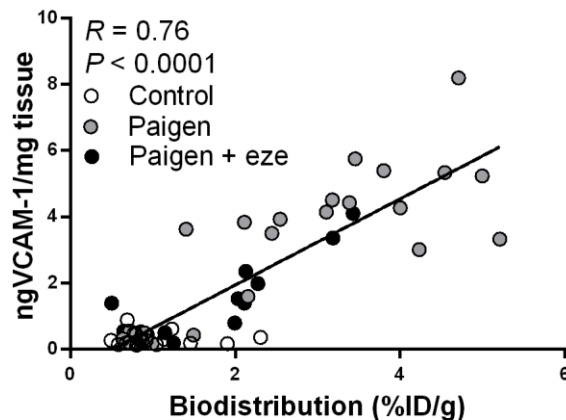

Supplemental Figure 3: Pearson correlation between VCAM-1 expression and <sup>99m</sup>Tc-cAbVCAM1-5 uptake in ascending aorta, aortic arch, and abdominal aorta.

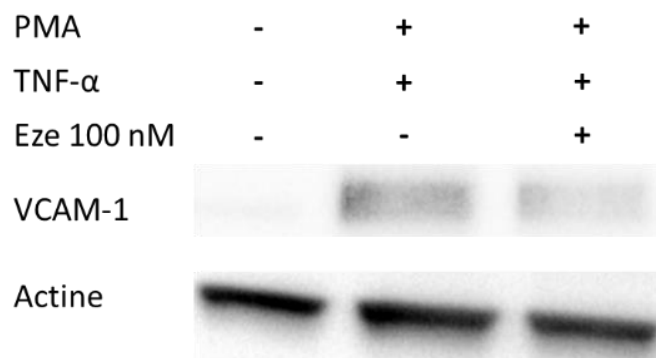

Supplemental Figure 4: Direct antiinflammatory effect of ezetimibe on VCAM-1 expression in THP-1 macrophages cells. THP-1 cells treated, or not, with 100 nM ezetimibe were induced into macrophages with PMA for 24 h and then stimulated with TNF-α for 24 h. Detection of VCAM-1 expression and α-actin was performed by western blot analysis.
